# Genetic analysis of functional rare germline variants across 9 cancer types from the DiscovEHR study

Manu Shivakumar<sup>1,2</sup>, Jason E. Miller<sup>2</sup>, Venkata Ramesh Dasari<sup>3</sup>, David Carey<sup>4</sup>, Radhika Gogoi<sup>3\*</sup>,  
Dokyoon Kim<sup>1,5,6\*</sup> on behalf of the DiscovEHR collaboration

<sup>1</sup> Biomedical & Translational Informatics Institute, Geisinger, Danville, PA, USA

<sup>2</sup> Department of Genetics, Perelman School of Medicine, University of Pennsylvania, Philadelphia, USA

<sup>3</sup> Weis Center for Research, Geisinger Clinic, Danville, PA, USA

<sup>4</sup> Department of Molecular and Functional Genomics, Geisinger, Danville, PA, USA

<sup>5</sup> Department of Biostatistics, Epidemiology and Informatics, Perelman School of Medicine, University of Pennsylvania, Philadelphia, USA

<sup>6</sup> Institute for Biomedical Informatics, University of Pennsylvania, Philadelphia, USA

## Abstract

Rare variants play an essential role in the etiology of cancer and characterizing rare germline variants that impact the risk of cancer is an ongoing challenge. We performed a genome-wide rare variant analysis using germline whole exome sequencing (WES) data derived from the Geisinger MyCode initiative to discover cancer predisposition variants. The case-control association analysis was conducted by binning pathogenic and likely pathogenic variants in 5,538 cancer patients and 7,286 matched controls in a discovery set and 1,991 cancer patients and 2,504 matched controls in a validation set across nine cancer types. We discovered 87 genes and 106 pathways significantly associated with cancer (*Bonferroni-corrected*  $P < 0.05$ ) out of which seven genes and 26 pathways replicated from the validation set (*suggestive threshold*  $P < 0.05$ ). Further, four genes and 21 pathways were discovered to be associated with multiple cancers (*Bonferroni-corrected*  $P < 0.05$ ). Additionally, we identified 13 genes and two pathways associated with survival outcome across seven cancers (*Bonferroni-corrected*  $P < 0.05$ ), where

31 two genes, *PCDHB8* and *DCHS2*, were also associated with survival outcome in TCGA data. In  
32 summary, we conducted one of the largest pan-cancer association studies using germline data  
33 derived from a single hospital system to find novel predisposition genes and pathways  
34 associated with nine cancers. Our results can inform future guidelines for germline genetic  
35 testing in cancer, which will be helpful in screening for cancer high-risk patients. This work adds  
36 to the knowledge base and progress being made in precision medicine.

37

38

## 39 **Introduction**

40 Cancer is the second most lethal disease in United States with an estimated 1,735,350 new  
41 cases and 609,640 deaths in 2018<sup>1</sup>. Cancer is caused by inherited germline variants and  
42 acquired somatic mutations. A recent twin study showed ~33% heritability of cancer across 23  
43 cancer types with a high estimate of 57% for prostate (MIM: 176807), 31% for breast (MIM:  
44 114480), 38% for kidney (MIM: 144700), and 58% for skin melanoma (MIM: 155600)<sup>2</sup>. Germline  
45 genetic markers for cancers have been widely studied leading to the discovery of many  
46 heritable predisposition genes such as *BRCA1* (MIM: 113705), *BRCA2* (MIM: 600185) and *PALB2*  
47 (MIM: 610355) in breast cancer, *RB1* (MIM: 614041) in retinoblastoma and *MLH1* (MIM:  
48 120436), *MSH2* (MIM: 609309), *MSH6* (MIM: 600678), and *PMS2* (MIM: 600259) in Lynch  
49 syndrome (MIM: 120435). To date, many genome-wide association studies (GWAS) have been  
50 conducted and many more variants and genes have been discovered as associated with various  
51 cancer types<sup>3-8</sup>. However, a large portion of inherited genetic factors that result in  
52 carcinogenesis is still unknown and many studies are being undertaken to discover these

53 genetic variants. For instance, the genetic contribution explained by all variants discovered to  
54 date is about 39% in prostate cancer<sup>2; 9</sup> and 30% in breast cancer<sup>2; 10</sup>.  
55  
56 Since common variants discovered to be associated with multiple cancers have only modest  
57 effect size, the missing heritability could be further explained by rare variants. Moreover, rare  
58 variants have been known to contribute to various complex diseases including cancer<sup>11-13</sup>. The  
59 aggregation of rare variants in a gene can lead to loss of function of the gene or change in  
60 expression<sup>14</sup>. Similarly, since pathways perform a sequence of biochemical actions leading to a  
61 cellular function or product, changes in the expression of genes involved within a pathway can  
62 lead to cancer<sup>15; 16</sup>. Previous studies have also indicated that cancer is caused by an  
63 accumulation of a number of singular or rare variants in particular genes or pathways<sup>12</sup>. To that  
64 effect, binning the pathogenic and likely pathogenic rare variants into genes and pathways  
65 would help us increase statistical power to detect associations and also infer biological  
66 mechanisms<sup>13; 17; 18</sup>.  
67  
68 The MyCode community initiative is a precision medicine project, launched at Geisinger in  
69 2007, which enabled the storage of blood, serum, and DNA samples in a system-wide  
70 biorepository that is available for use in broad research<sup>19</sup>. To date, over 244,000 patients have  
71 signed up for the MyCode initiative and over 90,000 patient blood samples have been  
72 sequenced as part of the DiscovEHR project in collaboration with the Regeneron Genetics  
73 Center<sup>20</sup>. The sequenced data can be easily linked to the electronic health record (EHR) of the  
74 patient, allowing access to rich longitudinal data. Apart from the EHR, Geisinger also maintains

75 a cancer registry that contains all the patients diagnosed or treated for cancer at any Geisinger  
76 medical facility. Further, as part of the MyCode program, the genetic data is also being used to  
77 detect increased risk of developing one or more of 21 medically actionable conditions, including  
78 breast cancer, ovarian cancer (MIM: 167000), Marfan syndrome (MIM: 154700), Lynch  
79 syndrome, etc., and the results are returned to the patients through a “Return of Results”  
80 program<sup>21</sup>. Moreover, many similar programs around the world are helping to integrate  
81 genomics into clinical practice<sup>22</sup>. Manolio et al. emphasize that the integration of genomic  
82 findings to clinical practice has been relatively slow and insist on the need to have an openly  
83 accessible knowledge base of variants, phenotypes and clinically actionable variants<sup>23</sup>. The  
84 sharing of genetic findings is likely to help the scientific research community to improve our  
85 understanding of the phenotype of interest and propel precision medicine by bringing more  
86 genomics into clinical practice.

87

88 In summary, we conducted one of the largest pan-cancer association studies using germline  
89 data from a single hospital system to find novel genes and pathways associated with nine  
90 cancers. Our study also validates several genes and pathways that have already been implicated  
91 in other genome-wide association studies. We identified 87 genes that were significant across  
92 cancers, of which seven were replicated in an independent dataset and four genes were shared  
93 among multiple cancers. We also identified 106 pathways that reached genome-wide  
94 significance, of which 26 pathways were replicated. Further, 21 pathways were significant  
95 across multiple cancers. In addition to the genes and pathways associated with cancer risk, we  
96 also identified 13 genes and two pathways associated with survival outcome across cancers.

97

## 98 **Results**

99

### 100 **Study design and population characteristics**

101

102 This study was based on a subset of 7,449 cancer cases and 9,792 controls selected by matching  
103 age, BMI and gender from ~90,000 sequenced samples from the DiscovEHR study. The samples  
104 were sequenced in two phases using different platforms as described in the Methods section. In  
105 phase 1, 60,000 samples were sequenced, and 5,538 cancer patients across nine cancers and  
106 7,286 matched controls were pulled. In phase 2, 30,000 samples were sequenced which  
107 included 1,991 cancer patients and 2,504 matched controls. Consequently, the phase 2 dataset  
108 was used to replicate results from phase 1. Cancer patient IDs that were retrieved from the  
109 cancer registry were classified into particular cancers using International Classification of  
110 Diseases for Oncology (ICD-O) codes. After classifying the cancer patients to their respective  
111 cancers, only nine cancers, including bladder (MIM: 109800), breast, colorectal (MIM: 114500),  
112 kidney, lung (MIM: 211980), melanoma, prostate, thyroid (MIM: 188550), and uterine cancer,  
113 had more than 300 samples in the discovery set. A low number of samples in association  
114 studies results in a higher type 1 error rate and lower statistical power to detect associations<sup>24</sup>.  
115 Thus, the rest of the cancers were excluded from this study. The distribution and basic  
116 demographics of patients across these cancers are shown in Table 1. A common set of controls  
117 were used for all the cancers except breast, uterine and prostate cancer as they are sex-specific

118 cancers. The sex-matched controls were separately pulled to match the same number of  
119 controls across all cancers.

120

121 Table 1 provides age, BMI, female ratio, and vital status (alive or deceased) information across  
122 cancers. Among all cancers, breast cancer had the largest number of cases (N = 1,214) followed  
123 by prostate cancer (N = 1,146). Further, uterine cancer had a significantly higher average BMI as  
124 compared to other cancers. The average BMI for uterine cancer patients was 38.33 kg/m<sup>2</sup> in the  
125 discovery dataset and 36.76 kg/m<sup>2</sup> in the replication dataset. Additionally, lung cancer had the  
126 highest number of cases who are deceased, which is expected as lung cancer is by far the  
127 leading cause of death due to cancer<sup>1</sup>. Further, observing the female ratio across the cancers  
128 also shows a gender disparity in some cancers. Specifically, the incidence rate in bladder cancer  
129 was found to be 4.46 fold higher in male than female, and in thyroid cancer it was 3.95 fold  
130 higher in female than male. The difference in incidence rates have been well documented in  
131 other studies with a 3-4 times increased risk of bladder cancer risk in men<sup>25</sup> and 2.9 times  
132 increased risk of thyroid cancer in women<sup>26</sup>.

133

134 Variant filtering based on functional annotation and scores improves power and has been  
135 successfully used in many association studies<sup>14; 27</sup>. In this study, the variants from whole exome  
136 sequence data were annotated using Variant Effect Predictor (VEP)<sup>28</sup> and ClinVar<sup>29</sup>.

137 Subsequently, only the variants categorized as pathogenic and likely-pathogenic based on the  
138 annotations were retained for further analysis. A strategy for classifying variants as pathogenic  
139 and likely pathogenic is elaborated in the Methods section. Additionally, all common variants

140 were removed, and only rare variants (MAF < 0.05) were retained. The number of variants  
141 available after filtering out for each cancer cohort is listed in Table S1.

142

### 143 **Pathway-based rare variant analysis**

144

145 Association analysis using rare variants usually suffers from a lack of power as very large  
146 datasets are required. Therefore, rare variants are often binned into a biologically informed-  
147 unit such as a gene or pathway to improve the power<sup>17</sup>. In this study, pathogenic and likely  
148 pathogenic rare variants with minor allele frequency (MAF) < 0.05 were binned into genes  
149 followed by KEGG pathways using BioBin<sup>17; 30; 31</sup>. Next, an association test was performed to  
150 determine if the gene/pathway is significantly associated with the phenotype. SKAT-O is an  
151 optimal unified approach that combines a burden and non-burden sequence kernel association  
152 test (SKAT) test, and maintains power regardless of the direction of effect and causality of the  
153 variants<sup>32</sup>. After determining the association p-values, they were adjusted for multiple testing in  
154 each cancer type separately using a Bonferroni correction. Any genes/pathways with a  
155 Bonferroni-corrected  $P < 0.05$  were considered as significant results. The same procedure was  
156 followed to conduct rare variant analysis in discovery and replication datasets. Figure 2 shows  
157 all the pathways that were Bonferroni significant across all cancers and the same are listed in  
158 Table S4-S6.

159

160 In total, 106 pathways were found to be significantly associated across all cancers (Figure 2).

161 However, no significant pathways were found in prostate cancer. Further, 26 pathways: 12 in

162 bladder cancer, five in colorectal cancer, five in kidney cancer, two in lung cancer and two in  
163 thyroid cancer, marked in red in Figure 2, were replicated from the replication dataset (SKAT-O  
164  $P < 0.05$ ). More information regarding the 26 pathways including locus count, minor allele  
165 count (MAC) in cases, MAC in controls, SKAT-O p-value and Bonferroni-corrected p-value in  
166 discovery and replication datasets can be found in Table 2. Additionally, 21 pathways were  
167 found to be significantly associated in more than one cancer, with the FoxO signaling pathway  
168 and GnRH signaling pathway significantly associated with four cancers, followed by apoptosis  
169 and bladder cancer significantly associated with three cancers and the rest of the 17 pathways  
170 significantly associated with two cancers (Table 3).

171

## 172 **Gene-based rare variant analysis**

173

174 All pathogenic and likely pathogenic variants below  $MAF < 0.05$  were binned into gene  
175 boundaries defined by Entrez annotations derived from Library of Knowledge Integration (LOKI)  
176 using BioBin<sup>17; 30</sup>. The total number of genes that the variants were binned across all cancers is  
177 listed in Table S2. The bar plot in Figure 3 shows the total number of loci binned for a given  
178 gene and variant types as annotated by VEP. In total, there were 87 genes that were  
179 significantly associated with a specific cancer (Bonferroni-corrected  $P < 0.05$ ) (Figure 3).

180 Furthermore, seven genes - *MLNR* (MIM: 602885), *CPAMD8* (MIM: 608841), *CHRNE* (MIM:  
181 100725), *HOXB13* (MIM: 604607), *SCML4* (HGNC: 256380), *BST1* (MIM: 600387) and *TMEM186*  
182 (HGNC: 25880), marked in red in Figure 3, were replicated in the phase 2 dataset ( $P < 0.05$ )  
183 (Table 4).



184

185 Additionally, four genes, including *MAPK12* (MIM: 602399), *ECE2* (MIM: 610145), *DNMT3A*  
186 (MIM: 602769) and *CHIA* (MIM: 606080), were significantly associated in multiple cancers. The  
187 gene *MAPK12* was significantly associated with bladder cancer and colorectal cancer, *ECE2* and  
188 *CHIA* for melanoma and colorectal cancer, and *DNMT3A* for bladder and lung cancer. Further  
189 association test statistics on these genes are described in Table 5. The PhenoGram<sup>33</sup> plot in  
190 Figure 4 shows all the genes found to be significantly associated across all cancers. Additionally,  
191 the lollipop<sup>34</sup> plots in Figure 5 and Figure S1 shows the type of variants – frameshift, missense,  
192 stop gained, stop lost, splice acceptor, splice donor, start lost, and their relative position in the  
193 gene. Variants that were found in the Catalog of Somatic Mutation in Cancer (COSMIC)  
194 database were marked with COSMIC ids. The nonsense stop gained variants marked in yellow  
195 usually results in a truncated protein, which are non-functional and the frameshift variants  
196 marked in red usually cause a loss of function due to a shift in the reading frame.

197

### 198 **Pathogenic and likely pathogenic variants in known oncogenes and tumor suppressor genes**

199

200 Previously, Huang et al.<sup>14</sup> identified potential genes in cancers with a higher enrichment of  
201 pathogenic or likely pathogenic variants identified in the Exome Aggregation Consortium (ExAC)  
202 non-TCGA cohort from a curated list of genes that contribute to cancer susceptibility. They  
203 identified 28 cancer gene associations (FDR < 0.05) and 16 suggestive associations (FDR < 0.15)  
204 by conducting total frequency test (TFT)<sup>14</sup> on germline data across 33 cancers. We wanted to  
205 see if any of these genes also had higher mutational germline burden in our study as it would

206 help validate cancer susceptibility genes and even discover new gene associations that were  
207 not statistically significant in Huang et al. As such, the list of gene-cancer pairs were filtered to  
208 the nine cancer types under consideration in this study and TFT was run on the genes to  
209 validate the enrichment of pathogenic and likely pathogenic variants in cancer patients against  
210 control group. Seven genes – *ATM* (lung, MIM: 607585), *CHECK2* (breast, HGNC: 11200), *MSH2*  
211 (colorectal), *BRCA2* (thyroid), *POLE* (kidney, MIM: 174762), *PALB2* (breast), *MLH1* (colorectal)  
212 were found to be significant at a TFT p-value < 0.05. Moreover, two of the genes – *ATM* (lung)  
213 and *BRCA2* (thyroid) found to be previously significant<sup>14</sup> were replicated in this study. Further,  
214 three genes – *ATM* (lung), *CHECK2* (breast) and *MSH2* (colorectal) were significant at FDR <  
215 0.15. The carrier frequency of these genes and distribution of pathogenic and likely pathogenic  
216 variants across oncogenes and tumor suppressor genes is shown in Figure 6 (Table S8). In  
217 summary, we were able to validate two genes (TFT p-value < 0.05) and we discovered two more  
218 genes with a suggestive association (FDR < 0.15).

219

## 220 **Survival analysis**

221

222 In this study, we also sought to discover variants that have an impact on the survival of  
223 patients. To this aim, a weighed burden matrix was used to run cox regression adjusting for age  
224 and BMI as covariates. The cox p-values were further adjusted using a Bonferroni correction  
225 separately on each cancer type to account for multiple testing. Thirteen genes and two  
226 pathways across seven cancers were found to be significantly associated with survival at  
227 Bonferroni < 0.05. Further, to confirm that the p-values were not a random effect, permutation

228 testing was conducted by randomly shuffling the weighed burden values among patients and  
229 running cox regression 100,000 times. We observed considerably less significant permutation p-  
230 values across all genes and pathways. The permutation p-values and other statistics are listed in  
231 Table 6 for significant genes and Table 7 for significant pathways. All the Kaplan-Meier survival  
232 curves are shown in Figure S2. The genes that were significantly associated were further tested  
233 for association with survival in The Cancer Genome Atlas (TCGA) provisional data on the cBio  
234 Cancer Genomics Portal (<http://cbioportal.org>)<sup>35</sup>. The two groups were formed using somatic  
235 mutations and mRNA expression (RNA Seq V2 RSEM) using a z-score threshold  $\pm 2$ . Two genes  
236 *PCDHB8* (*Logrank P* = 9.22E-03, MIM: 606334) and *DCHS2* (*Logrank P* = 0.036, MIM: 612486)  
237 were significant at a *Logrank P* < 0.05.

238

## 239 Discussion

240

241 In this study, we present results from a rare variant analysis conducted across nine cancers  
242 using a cohort of 7,449 cancer cases and 9,792 controls from a single hospital system using  
243 whole exome sequencing data and clinical data from a patient EHR. A total of 133 pathways (26  
244 replicated) and 91 genes (7 replicated) were identified as associated with cancers. Furthermore,  
245 21 pathways and four genes were associated with multiple cancer types. Additionally, we  
246 identified 13 genes and two pathways as associated with survival across multiple cancers.

247

248 Many KEGG pathways identified in this study have already been implicated in cancer, such as  
249 “pathways in cancer”, “GnRH signaling pathway”<sup>36</sup>, “bladder cancer”, “FoxO signaling pathway”

250 <sup>37</sup>, “metabolic pathways”, “gap junction” <sup>38</sup>, “apoptosis”, “base excision repair”, “melanoma”,  
251 “choline metabolism in cancer” and “basal cell carcinoma”. One pathway of interest that is  
252 associated with bladder cancer is the “insulin secretion pathway”. Previous studies have shown  
253 diabetes mellitus increases the risk of bladder cancer<sup>39</sup> and is possibly due to administration of  
254 the anti-diabetic drug Pioglitazone<sup>40</sup>. Another pathway “HTLV-I infection” was found to be  
255 associated with kidney cancer and was also replicated. HTLV-I is a known oncovirus that causes  
256 cancer<sup>41</sup>. Further studies on the “HTLV-I infection” pathway could elucidate the role of germline  
257 variants in cancers. Another pathway “Legionellosis” was found to be associated with kidney  
258 and bladder cancer, Legionella pneumonia in cancer has a very high mortality rate ~31%<sup>42</sup>, and  
259 variants in pathway could play a role in susceptibility or recovery of the patients. Another  
260 pathway, the “Hippo signaling pathway” was found to be associated with uterine cancer. The  
261 “Hippo tumor suppressor pathway” is known to phosphorylate YAP and TAZ which are critical  
262 for cell growth, reprogramming and development<sup>43</sup>. The Hippo pathway also interacts with the  
263 PI3K/AKT pathway which is commonly involved in cancer<sup>43</sup>. Additionally, Hippo pathway is  
264 known to affect the survival of cancer patients<sup>44</sup> and in this study, one of the genes *DCHS2*,  
265 which is part of Hippo pathway, was also associated with survival in uterine cancer and it was  
266 also replicated in the TCGA data.

267

268 A number of previous studies have shown *HOXB13* to be associated with prostate cancer<sup>45-48</sup>,  
269 and in this study as well, *HOXB13* was found to be associated with prostate cancer in the  
270 discovery dataset and was replicated. Another gene, *CPAMD8*, which is involved in broad-  
271 spectrum protease inhibition, innate immunity and damage control was found to be associated

272 with kidney cancer in the discovery and replication datasets<sup>49</sup>. *CPAMD8* is known to be  
273 substantially expressed in kidney<sup>49; 50</sup> and given its functional role, rare gene-disruptive variants  
274 in *CPAMD8* could lead to carcinogenesis. We also identified two genes associated with uterine  
275 cancer that replicated - *CHRNE* which is a subunit of nicotinic acetylcholine receptors (nAChRs)  
276 and *TMEM186* which is a member of the transmembrane protein family. Nicotine, a compound  
277 present in cigarettes, mediates cell proliferation and angiogenesis through nicotinic  
278 acetylcholine receptors (nAChRs) and its subunits<sup>51</sup>. Still, its mechanism of action is not well  
279 understood for uterine cancer where some studies have shown smoking to reduce the risk of  
280 uterine cancer contrary to other cancers<sup>51; 52</sup>. Again, the exact role of *TMEM186* in uterine  
281 cancer is also unexplored. TMEMs are differentially regulated in many types of cancers and  
282 some TMEMs are known to act as tumor suppressors while others as oncogenes<sup>53</sup>. Further, in  
283 bladder cancer, the Putative Polycomb group (PcG) protein gene (*SCML4*), is involved in the  
284 regulation of crucial developmental and physiological processes and is known to promote  
285 proliferation and inhibit apoptosis. *SCML4* was replicated in bladder cancer<sup>54</sup>.

286

287 Different cancer types share some pathways and genes, which generally include common  
288 tumor suppressor genes and oncogenes<sup>14</sup>. In this study, we identified 21 pathways and four  
289 genes that were associated with multiple cancers. Two of the genes *MAPK12* and *DNMT3A* are  
290 well known genes involved in cancer with *MAPK12* acting as *p38 MAPK*, which is involved in cell  
291 differentiation, apoptosis and autophagy, whereas *DNMT3A* is involved in DNA methylation and  
292 its disruption leads to tumorigenesis<sup>55; 56</sup>. Gene *ECE2* cleaves endothelin-1 (ET-1) which is a  
293 potent vasoconstrictor peptide and ET-1 is known to be involved in angiogenesis, apoptosis and

294 growth in colorectal cancer and melanoma<sup>57</sup>. Elevated levels of plasma levels and increased  
295 immunopositivity of ET-1 has been observed in colorectal cancer<sup>57</sup>.

296

297 We also discovered 13 genes that are associated with survival in cancers. The presence of rare  
298 pathogenic and likely pathogenic variants reduced the overall survival rate for all the genes  
299 identified across cancers. Some of the genes discovered were already known to be associated  
300 with survival in cancers and a subset of them have also been suggested as a target for cancer  
301 therapy like *SAXO2* (HGNC: 283726) which is involved in microtubule binding in uterine  
302 cancer<sup>58</sup>, *PCDHB8* whose downregulation is known to result in poor prognosis in bladder  
303 cancer<sup>59</sup>, *ATXN3* (MIM: 607047) whose downregulation increases expression of tumor  
304 suppressor *PTEN* (MIM: 601728)<sup>60</sup>, and *TPTE2* (MIM: 606791), a homolog of *PTEN*, whose  
305 upregulation suppresses metastasis and/or tumorigenesis<sup>61</sup>. Other genes were associated with  
306 survival in this study - *ANO5* (MIM: 608662) is known to regulate cell migration and invasion<sup>62</sup>,  
307 the *HOGA1* (MIM: 613597) gene is involved in metabolism, *CSH2* (MIM: 118820) is involved in  
308 postnatal and intrauterine growth<sup>63</sup> and *HLA-G* (MIM: 142871) offers an immune escape  
309 mechanism as it is involved in cytokine signaling in the immune system and class I MHC  
310 mediated antigen processing and presentation<sup>64</sup>. Thus, disruption of the normal activity of  
311 these genes could promote cancer. Another gene *NAA38* (MIM: 617990) which was associated  
312 with survival in thyroid has been shown to be associated with survival in glioblastoma (MIM:  
313 137800)<sup>65</sup>. Furthermore, two genes *PCDHB8* and *DCHS2* were significantly associated with  
314 survival in the TCGA provisional dataset.

315

316 Even though many associations were identified in this study, further studies would be required  
317 to elucidate the molecular mechanisms. A shortcoming of this study was that the replication  
318 cohort was underpowered to replicate all the findings. Additionally, the participants in the  
319 replication cohort were derived from participants who enrolled into the MyCode program more  
320 recently than the discovery dataset. Therefore, most of the patients in the replication set were  
321 alive and it was not practical to run survival analysis using the replication dataset. The  
322 limitations imposed by the sample size and power would be addressed in the future as the  
323 MyCode and DiscovEHR programs are still ongoing and more samples are being sequenced.  
324 Another limitation of our study is that our population predominantly consists of European  
325 ancestry, mainly due to the patient population at Geisinger which is predominantly of European  
326 ancestry.

327

328 In conclusion, this study conducted genome-wide rare-variant analysis to find novel genes and  
329 pathways associated across nine cancers. We also replicated many genes and pathways that are  
330 very well known in cancers, which further emphasizes the fact that some portion of the missing  
331 heritability is attributed to rare variants. We also identified some genes associated with the  
332 survival of the patients which have already been suggested as targets in cancer therapy. We  
333 also discovered novel genes and pathways associated with survival of patients which could be  
334 potential targets for cancer therapy. The genes and pathways discovered in this study can be  
335 used to screen for high-risk cancer patients and personalized therapy. In summary, results from  
336 this study could help define a portion of the missing heritability associated with cancer and  
337 have broad applications in precision medicine.

338

## 339 **Methods**

340

### 341 **Study population**

342 The study population consisted of Geisinger patients who consented to participate in the  
343 MyCode community initiative. As part of MyCode initiative, individuals agreed to provide blood  
344 and DNA samples for broad, future research, including genomic analyses as part of the  
345 Regeneron-Geisinger DiscovEHR collaboration and linking to data in the Geisinger EHR under a  
346 protocol approved by the Geisinger Institutional Review Board. The cases were a subset of  
347 cancer patients from a cancer registry that were part of 90,000 patients sequenced as part of  
348 the DiscovEHR project. The cases were classified into different cancers using ICD-O site codes as  
349 defined in Table S3. Cases that were recorded as having cancer in multiple primary sites were  
350 removed. Further, only cancers with at least 300 cases in 60,000 patients were sequenced in  
351 phase 1 of the DiscovEHR study were included and other cancers were discarded due to a low  
352 number of cases. A common control set was selected for all non-sex specific cancers using  
353 matched age and BMI to cases from a pool of patients who did not have any ICD9/ICD10 code  
354 related to cancer in a problem-list entry of the diagnosis code, an inpatient hospitalization-  
355 discharge diagnosis code, or an encounter diagnosis code. The controls for breast, uterine and  
356 prostate cancer were pulled separately to have the same number of controls as the common  
357 control set. Age was calculated as age at diagnosis for cases and current age if alive or age at  
358 death for controls. The median of BMI values recorded in the EHR from a year before diagnosis  
359 date was used as BMI for cases. Furthermore, the median of BMI values from a year before



360 current date or date of death for alive and deceased patients respectively was used as BMI for  
361 controls.

362

### 363 **Sequencing and quality control**

364 All the study population was sequenced as part of the DiscovEHR project at the Regeneron  
365 Genetic Center. Initially, around 60,000 samples were sequenced using NimbleGen probe  
366 target-capture (SeqCap VCRome) and further a separate batch of 30,000 samples were  
367 sequenced using xGen capture (Integrated DNA Technologies) followed by sequencing on the  
368 Illumina HiSeq 2500. The variant calling was done using GATK<sup>66; 67</sup>. Further detailed description  
369 of sequencing is available at Shivakumar et al.<sup>13</sup> and Mirshahi et al.<sup>68</sup>. Additional call rate quality  
370 controls were applied. The markers and samples with a call rate below 90% were filtered out.  
371 All related patients showing up to 3<sup>rd</sup> degree relatedness corresponding to IBD > 0.125 were  
372 removed.

373

### 374 **Variant annotation and filtering**

375

376 All variants were annotated using VEP and ClinVar. All the loci that satisfied the following two  
377 conditions were retained and the rest were filtered out.

- 378 1. Loci that were annotated with impact 'HIGH' using VEP.
- 379 2. Loci that were annotated as pathogenic and likely pathogenic with at least 1 star using  
380 ClinVar.

381 Variants that satisfied the conditions were considered pathogenic and likely pathogenic and all  
382 analysis were run using only these loci.

383

#### 384 **Gene based rare variant association**

385

386 All the variants that were annotated as pathogenic and likely pathogenic were binned using  
387 BioBin<sup>17; 30</sup>. BioBin uses pre-compiled knowledge in a LOKI database, which is compiled using  
388 information from various data sources including Entrez and KEGG. The variants were binned  
389 into genes using Entrez annotations. Only variants with MAF < 0.05 were considered rare and  
390 the rest of the variants were filtered out. Additionally, bins with less than 20 variants (MAC)  
391 were filtered out due to low sample size. Further, the binned variants were weighed using  
392 Madsen-browning weights<sup>69</sup>. The statistical association tests were run using SKAT-O  
393 implemented as R package<sup>32</sup>. Additionally, the association tests were adjusted using age, BMI  
394 and first four principle components as covariates. The principle components were calculated  
395 using EIGENSOFT<sup>70</sup>, using common variants after LD pruning with indep-pairwise 50 5 0.5 and  
396 Hardy-Weinberg equilibrium of  $10^{-6}$ . The association test p-values were further adjusted using  
397 Bonferroni correction to account for multiple testing correction.

398

#### 399 **Pathway based rare variant association**

400 BioBin was used to bin rare variants with a MAF < 0.05 into KEGG pathways derived from  
401 LOKI<sup>17; 30</sup>. Any pathway bin that did not contain a total of at least 20 variants across case and  
402 cancer were filtered out due to small sample size. Further all the bins were weighted using

403 Madsen-browning weighting<sup>69</sup>. Statistical association was run using SKAT-O implemented as R  
404 package<sup>32</sup>. The association tests were adjusted using age, BMI and four principle components  
405 as covariates. Further, the association p-values were adjusted using Bonferroni correction.

406

#### 407 **Survival analysis**

408

409 Survival analysis was run using cox regression adjusting for age and BMI. Specifically, the BioBin  
410 bin-phe output files which contains a weighted burden of variants were used to get the  
411 weighted burden of each patient for the bin (gene/pathway) and cox regression was run on the  
412 bin adjusting for age and BMI. Survival analysis was performed on each cancer using gene-  
413 based bins and pathway-based bins. Further, survival p-values were adjusted for multiple  
414 testing using Bonferroni correction.

415

#### 416 **Author contributions**

417

418 MS, JEM, VRD, RG and DK designed and conceived the project. MS and JEM carried out the  
419 methodology and implementation. DK and RG helped supervise the project. MS wrote the  
420 paper in consultation with JEM, VRD, RG and DK.

421

#### 422 **Conflicts of Interest**

423

424 The authors declare that they have no competing interests.

425

426 **Acknowledgement**

427

428 This work was supported by NLM R01 NL012535. This project was also funded, in part, under a  
429 grant with the Pennsylvania Department of Health (#SAP 4100070267). The Department  
430 specifically disclaims responsibility for any analyses, interpretations or conclusions. We  
431 gratefully acknowledge the funding support from Geisinger Medical Center (SRC-075) (RG) and  
432 Rice Women’s Cancer Research Fund (RG and VRD). Support for this work was also provided by  
433 NHGRI T32HG009495-01 (JEM). The funders specifically disclaim responsibility for the study  
434 design, data collection, analyses, interpretation, conclusions, and writing of the manuscript.

435

436 **Web resources**

437

438 BioBin, <https://ritchielab.org/software/biobin-download>

439 VEP, <https://ensembl.org/info/docs/tools/vep/index.html>

440 ClinVar, <https://www.ncbi.nlm.nih.gov/clinvar/>

441 EIGENSOFT, <https://www.hsph.harvard.edu/alkes-price/software/>

442 OMIM, <http://www.omim.org/>

443 R statistical software, <https://www.r-project.org/>

444 NCBI, <https://www.ncbi.nlm.nih.gov/gene/4049>

445 DiscovEHR, <http://www.discoverhrshare.com/>

446

447 **References**

448

- 449 1. Siegel, R.L., Miller, K.D., and Jemal, A. (2018). Cancer statistics, 2018. CA: A Cancer Journal for  
450 Clinicians 68, 7-30.
- 451 2. Mucci, L.A., Hjelmborg, J.B., Harris, J.R., Czene, K., Havelick, D.J., Scheike, T., Graff, R.E., Holst,  
452 K., Möller, S., Unger, R.H., et al. (2016). Familial Risk and Heritability of Cancer Among  
453 Twins in Nordic Countries. JAMA 315, 68-76.
- 454 3. Ghousaini, M., Fletcher, O., Michailidou, K., Turnbull, C., Schmidt, M.K., Dicks, E., Dennis, J.,  
455 Wang, Q., Humphreys, M.K., Luccarini, C., et al. (2012). Genome-wide association  
456 analysis identifies three new breast cancer susceptibility loci. Nature genetics 44, 312-  
457 318.
- 458 4. Haiman, C.A., Chen, G.K., Vachon, C.M., Canzian, F., Dunning, A., Millikan, R.C., Wang, X.,  
459 Ademuyiwa, F., Ahmed, S., Ambrosone, C.B., et al. (2011). A common variant at the  
460 TERT-CLPTM1L locus is associated with estrogen receptor-negative breast cancer.  
461 Nature genetics 43, 1210-1214.
- 462 5. Kote-Jarai, Z., Olama, A.A.A., Giles, G.G., Severi, G., Schleutker, J., Weischer, M., Campa, D.,  
463 Riboli, E., Key, T., Gronberg, H., et al. (2011). Seven prostate cancer susceptibility loci  
464 identified by a multi-stage genome-wide association study. Nature genetics 43, 785-791.
- 465 6. Peters, U., Hutter, C.M., Hsu, L., Schumacher, F.R., Conti, D.V., Carlson, C.S., Edlund, C.K.,  
466 Haile, R.W., Gallinger, S., Zanke, B.W., et al. (2012). Meta-analysis of new genome-wide  
467 association studies of colorectal cancer risk. Human genetics 131, 217-234.
- 468 7. Al Olama, A.A., Kote-Jarai, Z., Berndt, S.I., Conti, D.V., Schumacher, F., Han, Y., Benlloch, S.,  
469 Hazelett, D.J., Wang, Z., Saunders, E., et al. (2014). A meta-analysis of 87,040 individuals  
470 identifies 23 new susceptibility loci for prostate cancer. Nature genetics 46, 1103-1109.
- 471 8. Artomov, M., Stratigos, A.J., Kim, I., Kumar, R., Lauss, M., Reddy, B.Y., Miao, B., Daniela  
472 Robles-Espinoza, C., Sankar, A., Njauw, C.-N., et al. (2017). Rare Variant, Gene-Based  
473 Association Study of Hereditary Melanoma Using Whole-Exome Sequencing. JNCI:  
474 Journal of the National Cancer Institute 109, djx083-djx083.
- 475 9. Amin Al Olama, A., Dadaev, T., Hazelett, D.J., Li, Q., Leongamornlert, D., Saunders, E.J.,  
476 Stephens, S., Cieza-Borrella, C., Whitmore, I., Benlloch Garcia, S., et al. (2015). Multiple  
477 novel prostate cancer susceptibility signals identified by fine-mapping of known risk loci  
478 among Europeans. Human molecular genetics 24, 5589-5602.
- 479 10. Complexo, Southey, M.C., Park, D.J., Nguyen-Dumont, T., Campbell, I., Thompson, E.,  
480 Trainer, A.H., Chenevix-Trench, G., Simard, J., Dumont, M., et al. (2013). COMPLEXO:  
481 identifying the missing heritability of breast cancer via next generation collaboration.  
482 Breast cancer research : BCR 15, 402-402.
- 483 11. Rahman, N. (2014). Realizing the promise of cancer predisposition genes. Nature 505, 302.
- 484 12. Schork, N.J., Murray, S.S., Frazer, K.A., and Topol, E.J. (2009). Common vs. rare allele  
485 hypotheses for complex diseases. Current opinion in genetics & development 19, 212-  
486 219.

- 487 13. Shivakumar, M., Miller, J.E., Dasari, V.R., Gogoi, R., and Kim, D. (2019). Exome-Wide Rare  
488 Variant Analysis From the DiscovEHR Study Identifies Novel Candidate Predisposition  
489 Genes for Endometrial Cancer. *Frontiers in Oncology* 9, 574.
- 490 14. Huang, K.-l., Mashl, R.J., Wu, Y., Ritter, D.l., Wang, J., Oh, C., Paczkowska, M., Reynolds, S.,  
491 Wyczalkowski, M.A., Oak, N., et al. (2018). Pathogenic Germline Variants in 10,389 Adult  
492 Cancers. *Cell* 173, 355-370.e314.
- 493 15. Li, D., Dong, X., Duell, E.J., Arslan, A.A., Zeleniuch-Jacquotte, A., Bueno-de-Mesquita, H.B.,  
494 Gallinger, S., Gross, M., Holly, E.A., Bracci, P.M., et al. (2012). Pathway analysis of  
495 genome-wide association study data highlights pancreatic development genes as  
496 susceptibility factors for pancreatic cancer. *Carcinogenesis* 33, 1384-1390.
- 497 16. Cantor, R.M., Lange, K., and Sinsheimer, J.S. (2010). Prioritizing GWAS results: A review of  
498 statistical methods and recommendations for their application. *American Journal of*  
499 *Human Genetics* 86, 6-22.
- 500 17. Moore, C.B., Wallace, J.R., Frase, A.T., Pendergrass, S.A., and Ritchie, M.D. (2013). BioBin: a  
501 bioinformatics tool for automating the binning of rare variants using publicly available  
502 biological knowledge. *BMC medical genomics* 6 Suppl 2, S6-S6.
- 503 18. Kim, D., Li, R., Dudek, S.M., Wallace, J.R., and Ritchie, M.D. (2015). Binning somatic  
504 mutations based on biological knowledge for predicting survival: an application in renal  
505 cell carcinoma. *Pacific Symposium on Biocomputing Pacific Symposium on*  
506 *Biocomputing*, 96-107.
- 507 19. Carey, D.J., Fetterolf, S.N., Davis, F.D., Faucett, W.A., Kirchner, H.L., Mirshahi, U., Murray,  
508 M.F., Smelser, D.T., Gerhard, G.S., and Ledbetter, D.H. (2016). The Geisinger MyCode  
509 community health initiative: an electronic health record-linked biobank for precision  
510 medicine research. *Genetics In Medicine* 18, 906.
- 511 20. Dewey, F.E., Murray, M.F., Overton, J.D., Habegger, L., Leader, J.B., Fetterolf, S.N.,  
512 O'Dushlaine, C., Van Hout, C.V., Staples, J., Gonzaga-Jauregui, C., et al. (2016).  
513 Distribution and clinical impact of functional variants in 50,726 whole-exome sequences  
514 from the DiscovEHR study. *Science* 354, aaf6814.
- 515 21. Schwartz, M.L.B., McCormick, C.Z., Lazzeri, A.L., Lindbuchler, D.A.M., Hallquist, M.L.G.,  
516 Manickam, K., Buchanan, A.H., Rahm, A.K., Giovanni, M.A., Frisbie, L., et al. (2018). A  
517 Model for Genome-First Care: Returning Secondary Genomic Findings to Participants  
518 and Their Healthcare Providers in a Large Research Cohort. *The American Journal of*  
519 *Human Genetics* 103, 328-337.
- 520 22. Stark, Z., Dolman, L., Manolio, T.A., Ozenberger, B., Hill, S.L., Caulfield, M.J., Levy, Y., Glazer,  
521 D., Wilson, J., Lawler, M., et al. (2019). Integrating Genomics into Healthcare: A Global  
522 Responsibility. *The American Journal of Human Genetics* 104, 13-20.
- 523 23. Manolio, T.A., Chisholm, R.L., Ozenberger, B., Roden, D.M., Williams, M.S., Wilson, R., Bick,  
524 D., Bottinger, E.P., Brilliant, M.H., Eng, C., et al. (2013). Implementing genomic medicine  
525 in the clinic: the future is here. *Genetics In Medicine* 15, 258.
- 526 24. Zhang, X., Basile, A.O., Pendergrass, S.A., and Ritchie, M.D. (2019). Real world scenarios in  
527 rare variant association analysis: the impact of imbalance and sample size on the power  
528 in silico. *BMC Bioinformatics* 20, 46.

- 529 25. Dobruch, J., Daneshmand, S., Fisch, M., Lotan, Y., Noon, A.P., Resnick, M.J., Shariat, S.F.,  
530 Zlotta, A.R., and Boorjian, S.A. (2016). Gender and Bladder Cancer: A Collaborative  
531 Review of Etiology, Biology, and Outcomes. *European Urology* 69, 300-310.
- 532 26. Rahbari, R., Zhang, L., and Kebebew, E. (2010). Thyroid cancer gender disparity. *Future*  
533 *oncology* (London, England) 6, 1771-1779.
- 534 27. Esteban-Jurado, C., Vila-Casadesús, M., Garre, P., Lozano, J.J., Pristoupilova, A., Beltran, S.,  
535 Muñoz, J., Ocaña, T., Balaguer, F., López-Cerón, M., et al. (2014). Whole-exome  
536 sequencing identifies rare pathogenic variants in new predisposition genes for familial  
537 colorectal cancer. *Genetics In Medicine* 17, 131.
- 538 28. McLaren, W., Gil, L., Hunt, S.E., Riat, H.S., Ritchie, G.R.S., Thormann, A., Flicek, P., and  
539 Cunningham, F. (2016). The Ensembl Variant Effect Predictor. *Genome Biology* 17, 122.
- 540 29. Landrum, M.J., Lee, J.M., Benson, M., Brown, G., Chao, C., Chitipiralla, S., Gu, B., Hart, J.,  
541 Hoffman, D., Hoover, J., et al. (2016). ClinVar: public archive of interpretations of  
542 clinically relevant variants. *Nucleic Acids Research* 44, D862-D868.
- 543 30. Basile, A.O., Byrska-Bishop, M., Wallace, J., Frase, A.T., and Ritchie, M.D. (2018). Novel  
544 features and enhancements in BioBin, a tool for the biologically inspired binning and  
545 association analysis of rare variants. *Bioinformatics* (Oxford, England) 34, 527-529.
- 546 31. Moore, C.C.B., Basile, A.O., Wallace, J.R., Frase, A.T., and Ritchie, M.D. (2016). A biologically  
547 informed method for detecting rare variant associations. *BioData mining* 9, 27-27.
- 548 32. Lee, S., Emond, M.J., Bamshad, M.J., Barnes, K.C., Rieder, M.J., Nickerson, D.A., Team,  
549 N.G.E.S.P.E.L.P., Christiani, D.C., Wurfel, M.M., and Lin, X. (2012). Optimal unified  
550 approach for rare-variant association testing with application to small-sample case-  
551 control whole-exome sequencing studies. *American Journal of Human Genetics* 91, 224-  
552 237.
- 553 33. Wolfe, D., Dudek, S., Ritchie, M.D., and Pendergrass, S.A. (2013). Visualizing genomic  
554 information across chromosomes with PhenoGram. *BioData mining* 6, 18-18.
- 555 34. Skidmore, Z.L., Wagner, A.H., Lesurf, R., Campbell, K.M., Kunisaki, J., Griffith, O.L., and  
556 Griffith, M. (2016). GenVisR: Genomic Visualizations in R. *Bioinformatics* (Oxford,  
557 England) 32, 3012-3014.
- 558 35. Gao, J., Aksoy, B.A., Dogrusoz, U., Dresdner, G., Gross, B., Sumer, S.O., Sun, Y., Jacobsen, A.,  
559 Sinha, R., Larsson, E., et al. (2013). Integrative analysis of complex cancer genomics and  
560 clinical profiles using the cBioPortal. *Science signaling* 6, pl1-pl1.
- 561 36. Gründker, C., and Emons, G. (2017). The Role of Gonadotropin-Releasing Hormone in  
562 Cancer Cell Proliferation and Metastasis. *Frontiers in endocrinology* 8, 187-187.
- 563 37. Farhan, M., Wang, H., Gaur, U., Little, P.J., Xu, J., and Zheng, W. (2017). FOXO Signaling  
564 Pathways as Therapeutic Targets in Cancer. *International journal of biological sciences*  
565 13, 815-827.
- 566 38. Aasen, T., Mesnil, M., Naus, C.C., Lampe, P.D., and Laird, D.W. (2016). Gap junctions and  
567 cancer: communicating for 50 years. *Nature reviews Cancer* 16, 775-788.
- 568 39. Fang, H., Yao, B., Yan, Y., Xu, H., Liu, Y., Tang, H., Zhou, J., Cao, L., Wang, W., Zhang, J., et al.  
569 (2013). Diabetes mellitus increases the risk of bladder cancer: an updated meta-analysis  
570 of observational studies. *Diabetes technology & therapeutics* 15, 914-922.
- 571 40. Tuccori, M., Filion, K.B., Yin, H., Yu, O.H., Platt, R.W., and Azoulay, L. (2016). Pioglitazone use  
572 and risk of bladder cancer: population based cohort study. *BMJ* 352, i1541.

- 573 41. Ahmadi Ghezeldasht, S., Shirdel, A., Assarehzadegan, M.A., Hassannia, T., Rahimi, H., Miri,  
574 R., and Rezaee, S.A.R. (2013). Human T Lymphotropic Virus Type I (HTLV-I) Oncogenesis:  
575 Molecular Aspects of Virus and Host Interactions in Pathogenesis of Adult T cell  
576 Leukemia/Lymphoma (ATL). *Iranian journal of basic medical sciences* 16, 179-195.
- 577 42. Jacobson, K.L., Miceli, M.H., Tarrand, J.J., and Kontoyiannis, D.P. (2008). Legionella  
578 Pneumonia in Cancer Patients. *Medicine* 87.
- 579 43. Wang, C., Gu, C., Jeong, K.J., Zhang, D., Guo, W., Lu, Y., Ju, Z., Panupinthu, N., Yang, J.Y.,  
580 Gagea, M., et al. (2017). YAP/TAZ-Mediated Upregulation of GAB2 Leads to Increased  
581 Sensitivity to Growth Factor–Induced Activation of the PI3K Pathway. *Cancer Research*  
582 77, 1637.
- 583 44. Poma, A.M., Torregrossa, L., Bruno, R., Basolo, F., and Fontanini, G. (2018). Hippo pathway  
584 affects survival of cancer patients: extensive analysis of TCGA data and review of  
585 literature. *Scientific reports* 8, 10623-10623.
- 586 45. Brechka, H., Bhanvadia, R.R., VanOpstall, C., and Vander Griend, D.J. (2017). HOXB13  
587 mutations and binding partners in prostate development and cancer: Function, clinical  
588 significance, and future directions. *Genes & diseases* 4, 75-87.
- 589 46. Ewing, C.M., Ray, A.M., Lange, E.M., Zuhlke, K.A., Robbins, C.M., Tembe, W.D., Wiley, K.E.,  
590 Isaacs, S.D., Johng, D., Wang, Y., et al. (2012). Germline Mutations in HOXB13 and  
591 Prostate-Cancer Risk. *New England Journal of Medicine* 366, 141-149.
- 592 47. Pilie, P.G., Giri, V.N., and Cooney, K.A. (2016). HOXB13 and other high penetrant genes for  
593 prostate cancer. *Asian journal of andrology* 18, 530-532.
- 594 48. Xu, J., Lange, E.M., Lu, L., Zheng, S.L., Wang, Z., Thibodeau, S.N., Cannon-Albright, L.A.,  
595 Teerlink, C.C., Camp, N.J., Johnson, A.M., et al. (2013). HOXB13 is a susceptibility gene  
596 for prostate cancer: results from the International Consortium for Prostate Cancer  
597 Genetics (ICPCG). *Human genetics* 132, 5-14.
- 598 49. Li, Z.-F., Wu, X.-h., and Engvall, E. (2004). Identification and characterization of CPAMD8, a  
599 novel member of the complement 3/ $\alpha$ 2-macroglobulin family with a C-terminal Kazal  
600 domain. *Genomics* 83, 1083-1093.
- 601 50. Porta-Pardo, E., Garcia-Alonso, L., Hrabe, T., Dopazo, J., and Godzik, A. (2015). A Pan-Cancer  
602 Catalogue of Cancer Driver Protein Interaction Interfaces. *PLOS Computational Biology*  
603 11, e1004518.
- 604 51. Singh, S., Pillai, S., and Chellappan, S. (2011). Nicotinic acetylcholine receptor signaling in  
605 tumor growth and metastasis. *Journal of oncology* 2011, 456743-456743.
- 606 52. Felix, A.S., Yang, H.P., Gierach, G.L., Park, Y., and Brinton, L.A. (2014). Cigarette smoking and  
607 endometrial carcinoma risk: the role of effect modification and tumor heterogeneity.  
608 *Cancer causes & control : CCC* 25, 479-489.
- 609 53. Schmit, K., and Michiels, C. (2018). TMEM Proteins in Cancer: A Review. *Frontiers in*  
610 *pharmacology* 9, 1345-1345.
- 611 54. Wang, W., Qin, J.-J., Voruganti, S., Nag, S., Zhou, J., and Zhang, R. (2015). Polycomb Group  
612 (PcG) Proteins and Human Cancers: Multifaceted Functions and Therapeutic  
613 Implications. *Medicinal research reviews* 35, 1220-1267.
- 614 55. Slattery, M.L., Lundgreen, A., and Wolff, R.K. (2012). MAP kinase genes and colon and rectal  
615 cancer. *Carcinogenesis* 33, 2398-2408.



- 616 56. Zhang, W., and Xu, J. (2017). DNA methyltransferases and their roles in tumorigenesis.  
617 Biomarker research 5, 1-1.
- 618 57. Grant, K., Loizidou, M., and Taylor, I. (2003). Endothelin-1: a multifunctional molecule in  
619 cancer. British journal of cancer 88, 163-166.
- 620 58. Mukhtar, E., Adhami, V.M., and Mukhtar, H. (2014). Targeting microtubules by natural  
621 agents for cancer therapy. Molecular cancer therapeutics 13, 275-284.
- 622 59. Ma, J.-G., He, Z.-K., Ma, J.-H., Li, W.-P., and Sun, G. (2013). Downregulation of  
623 protocadherin-10 expression correlates with malignant behaviour and poor prognosis in  
624 human bladder cancer. Journal of International Medical Research 41, 38-47.
- 625 60. Sacco, J.J., Yau, T.Y., Darling, S., Patel, V., Liu, H., Urbé, S., Clague, M.J., and Coulson, J.M.  
626 (2014). The deubiquitylase Ataxin-3 restricts PTEN transcription in lung cancer cells.  
627 Oncogene 33, 4265-4272.
- 628 61. Lusche, D.F., Buchele, E.C., Russell, K.B., Soll, B.A., Vitolo, M.I., Klemme, M.R., Wessels, D.J.,  
629 and Soll, D.R. (2018). Overexpressing TPTE2 (TPIP), a homolog of the human tumor  
630 suppressor gene PTEN, rescues the abnormal phenotype of the PTEN(-/-) mutant.  
631 Oncotarget 9, 21100-21121.
- 632 62. Chang, Z., Cai, C., Han, D., Gao, Y., Li, Q., Feng, L., Zhang, W., Zheng, J., Jin, J., Zhang, H., et  
633 al. (2017). Anoctamin5 regulates cell migration and invasion in thyroid cancer.  
634 International Journal of Oncology 51, 1311-1319.
- 635 63. Männik, J., Vaas, P., Rull, K., Teesalu, P., Rebane, T., and Laan, M. (2010). Differential  
636 expression profile of growth hormone/chorionic somatomammotropin genes in  
637 placenta of small- and large-for-gestational-age newborns. The Journal of clinical  
638 endocrinology and metabolism 95, 2433-2442.
- 639 64. Seliger, B., and Schlaf, G. (2007). Structure, expression and function of HLA-G in renal cell  
640 carcinoma. Seminars in Cancer Biology 17, 444-450.
- 641 65. Chen, Q.-R., Hu, Y., Yan, C., Buetow, K., and Meerzaman, D. (2014). Systematic genetic  
642 analysis identifies Cis-eQTL target genes associated with glioblastoma patient survival.  
643 PloS one 9, e105393-e105393.
- 644 66. McKenna, A., Hanna, M., Banks, E., Sivachenko, A., Cibulskis, K., Kernytzky, A., Garimella, K.,  
645 Altshuler, D., Gabriel, S., Daly, M., et al. (2010). The Genome Analysis Toolkit: A  
646 MapReduce framework for analyzing next-generation DNA sequencing data. Genome  
647 Research 20, 1297-1303.
- 648 67. Van der Auwera, G.A., Carneiro, M.O., Hartl, C., Poplin, R., del Angel, G., Levy-Moonshine,  
649 A., Jordan, T., Shakir, K., Roazen, D., Thibault, J., et al. (2013). From FastQ data to high  
650 confidence variant calls: the Genome Analysis Toolkit best practices pipeline. Current  
651 protocols in bioinformatics / editorial board, Andreas D Baxeavanis [et al] 11, 11.10.11-  
652 11.10.33.
- 653 68. Mirshahi, U.L., Luo, J.Z., Manickam, K., Wardeh, A.H., Mirshahi, T., Murray, M.F., and Carey,  
654 D.J. (2018). Trajectory of exonic variant discovery in a large clinical population:  
655 implications for variant curation. Genetics in Medicine.
- 656 69. Madsen, B.E., and Browning, S.R. (2009). A Groupwise Association Test for Rare Mutations  
657 Using a Weighted Sum Statistic. PLOS Genetics 5, e1000384.

658 70. Price, A.L., Patterson, N.J., Plenge, R.M., Weinblatt, M.E., Shadick, N.A., and Reich, D. (2006).  
659 Principal components analysis corrects for stratification in genome-wide association  
660 studies. *Nature Genetics* 38, 904.  
661

662

663

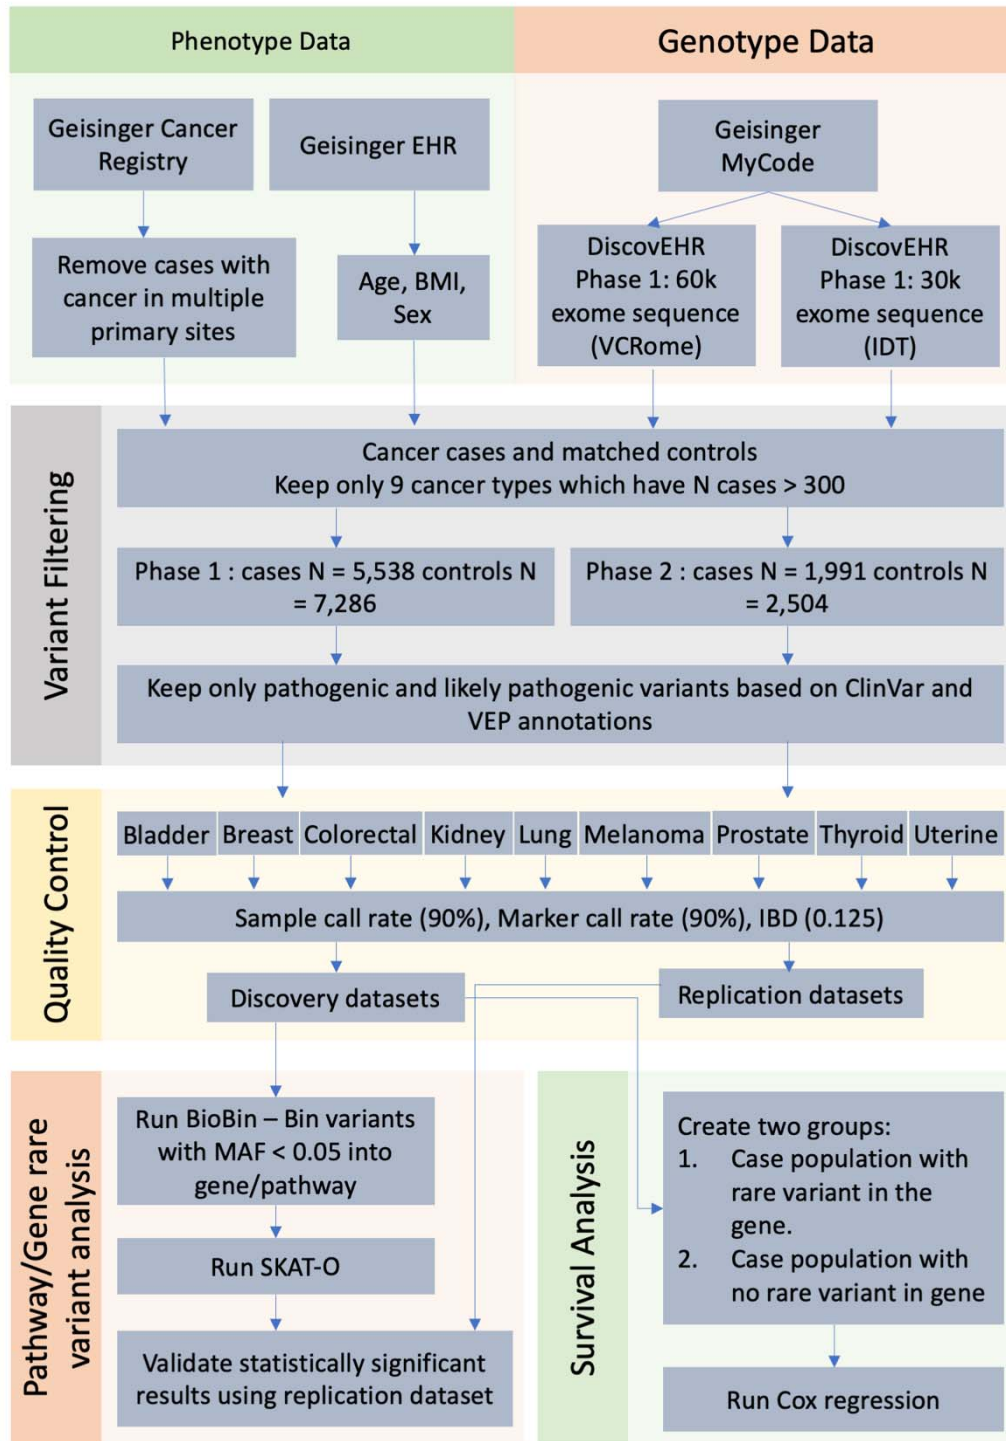

664  
665

666 **Figure 1.** Schematic overview of Pan-cancer analysis. The phenotype data was obtained from the  
667 Geisinger cancer registry and EHR and the genotype data was obtained from DiscovEHR study.  
668 Figure shows multiple steps involved in the analysis – variant filtering, quality control, rare  
669 variant analysis, and survival analysis.

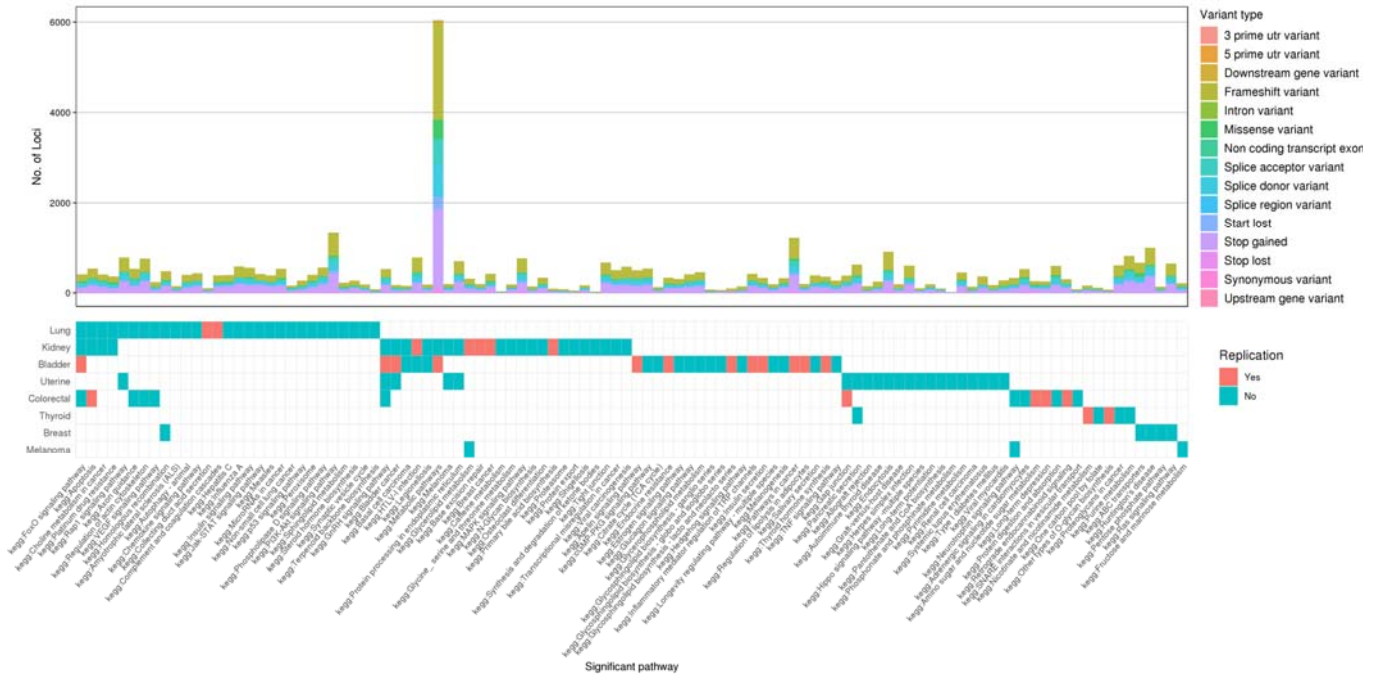

670  
671 **Figure 2.** Pathways (x-axis) that were significantly associated with cancer (y-axis) (Bonferroni-  
672 corrected  $P < 0.05$ ). The pathways marked as replication 'Yes' were significant in discovery  
673 (Bonferroni-corrected  $P < 0.05$ ) and replication (SKAT-O  $P < 0.05$ ) datasets. The top bar plot  
674 shows the distribution of variant types as annotated by VEP across each pathway.  
675  
676  
677  
678  
679  
680  
681  
682  
683  
684  
685  
686  
687  
688  
689  
690

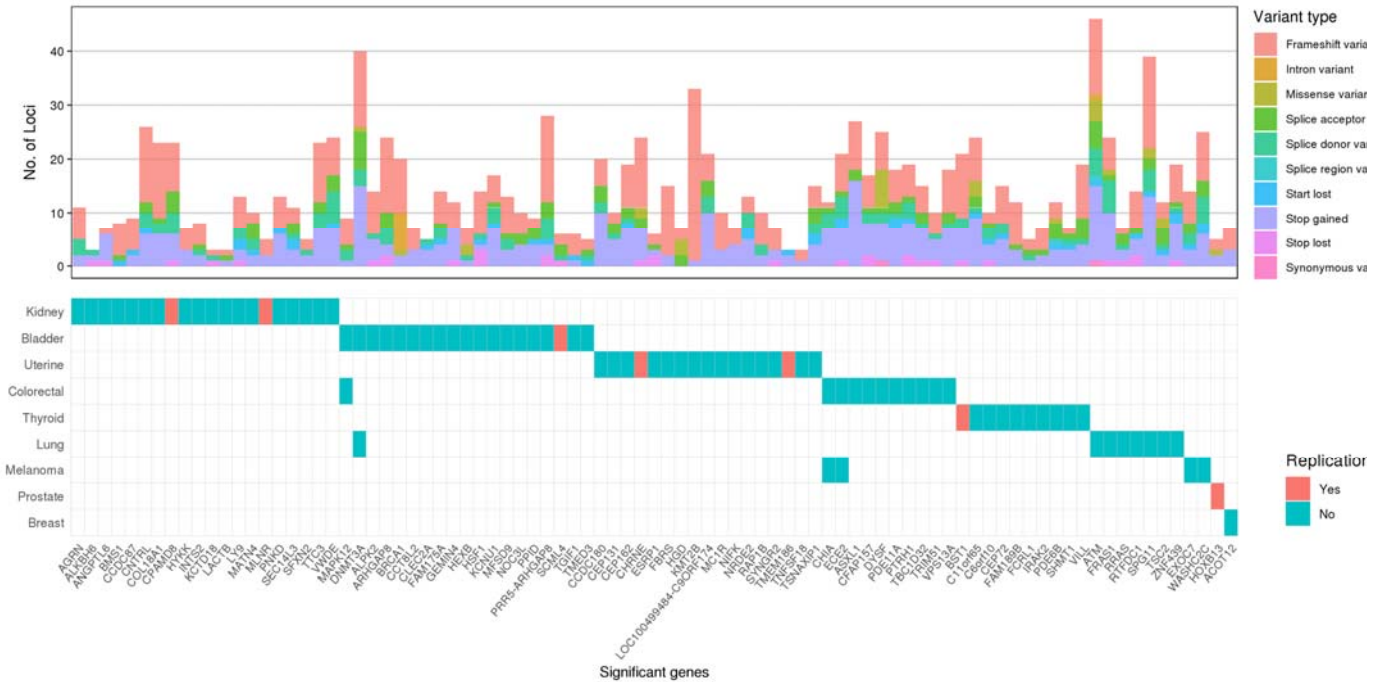

691  
692 **Figure 3.** Genes (x-axis) that were significantly associated with cancer (y-axis) using Bonferroni <  
693 0.05. The genes marked as replication 'Yes' were significant in discovery (Bonferroni < 0.05) and  
694 replication (association p-value < 0.05) datasets. The top bar plot shows the distribution of  
695 variant types as annotated by VEP across each gene.  
696

It is made available under a [CC-BY-NC-ND 4.0 International license](https://creativecommons.org/licenses/by-nc-nd/4.0/).

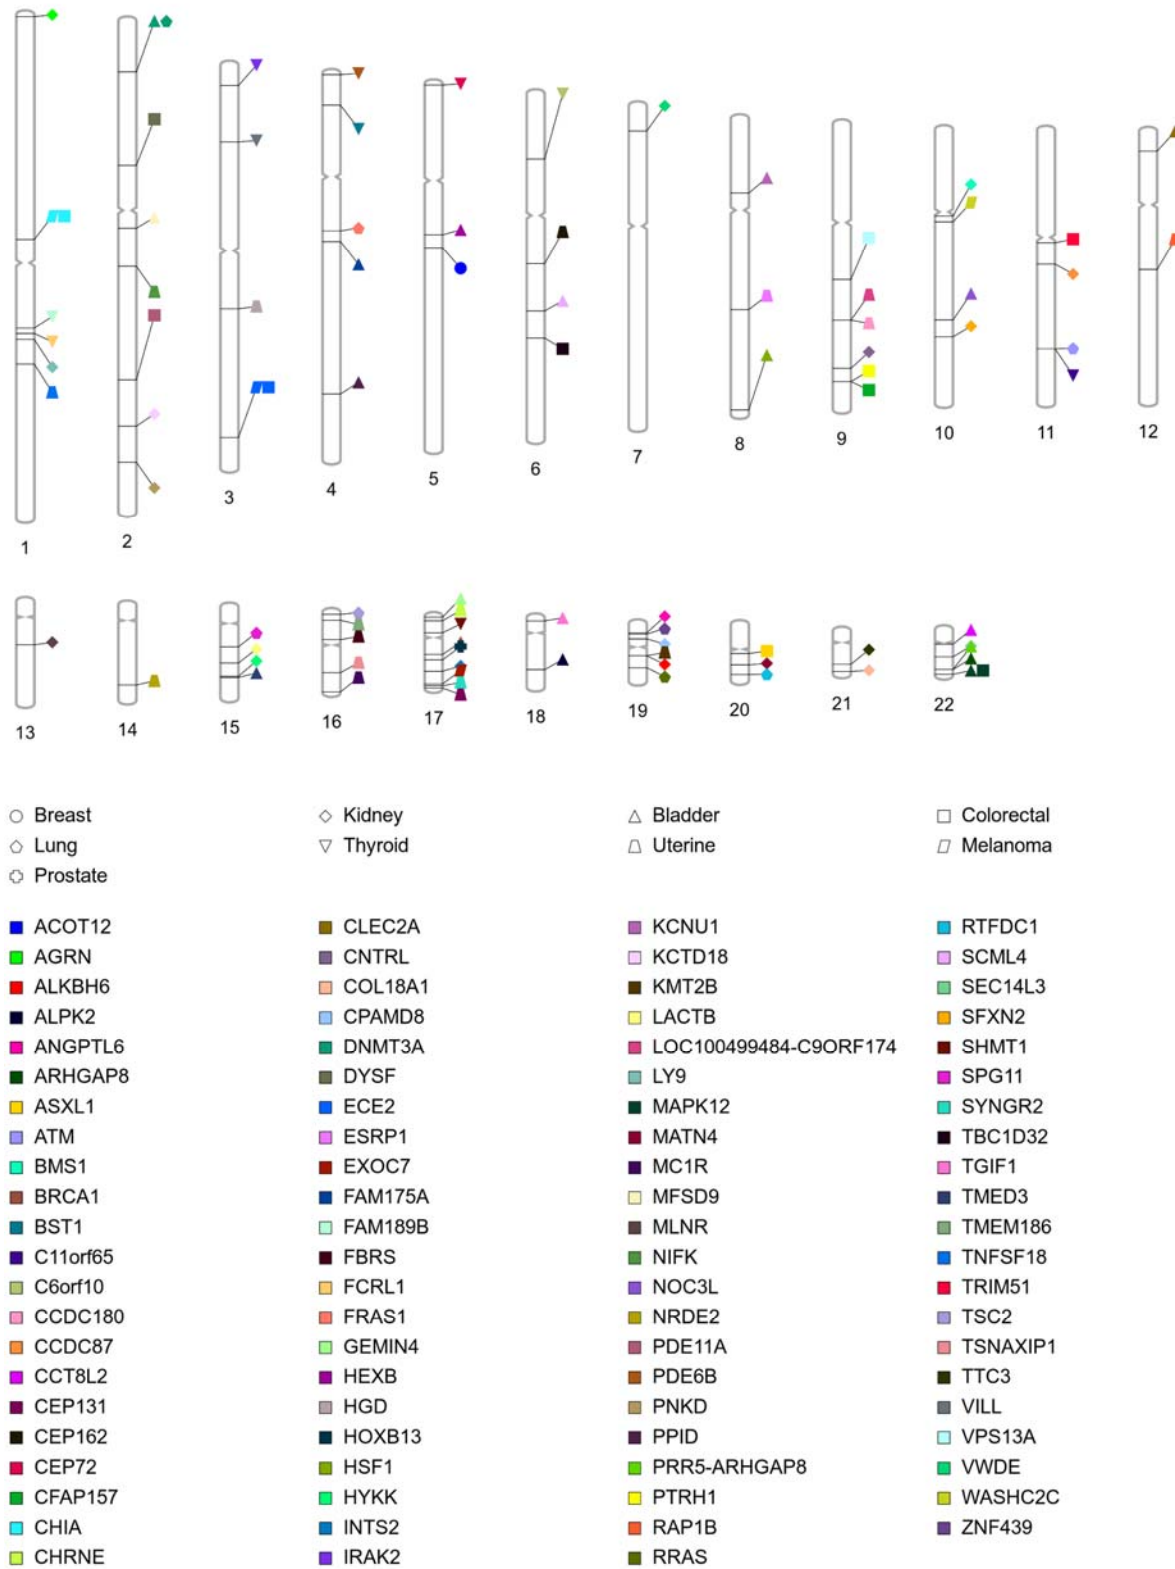

697  
698  
699  
700

**Figure 4.** PhenoGram plot of all significant genes across all cancers.

701

A.

● frameshift\_variant ● missense\_variant ● stop\_gained

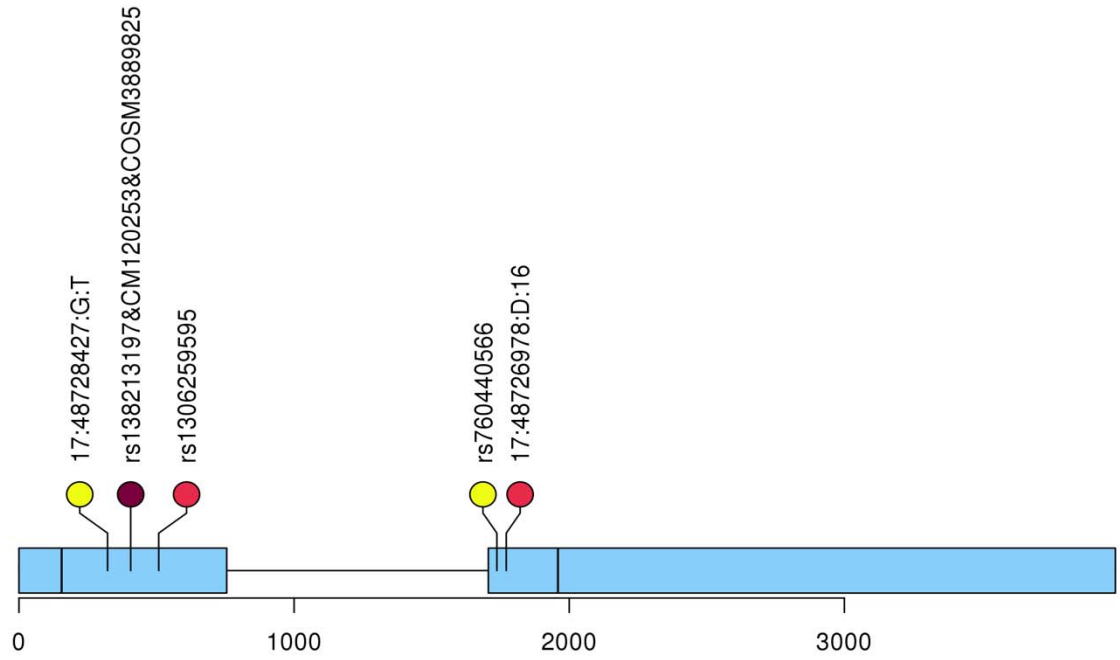

702

703

B.

● frameshift\_variant ● stop\_gained  
● splice\_acceptor\_variant ● splice\_donor\_variant

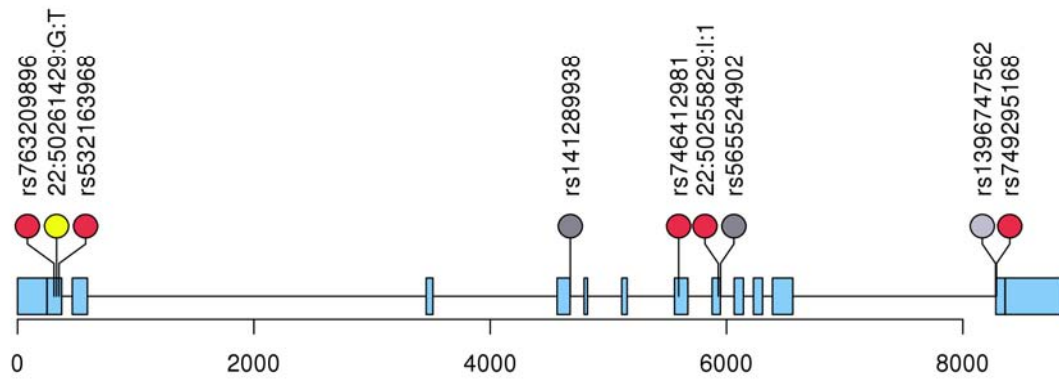

704

705 C.

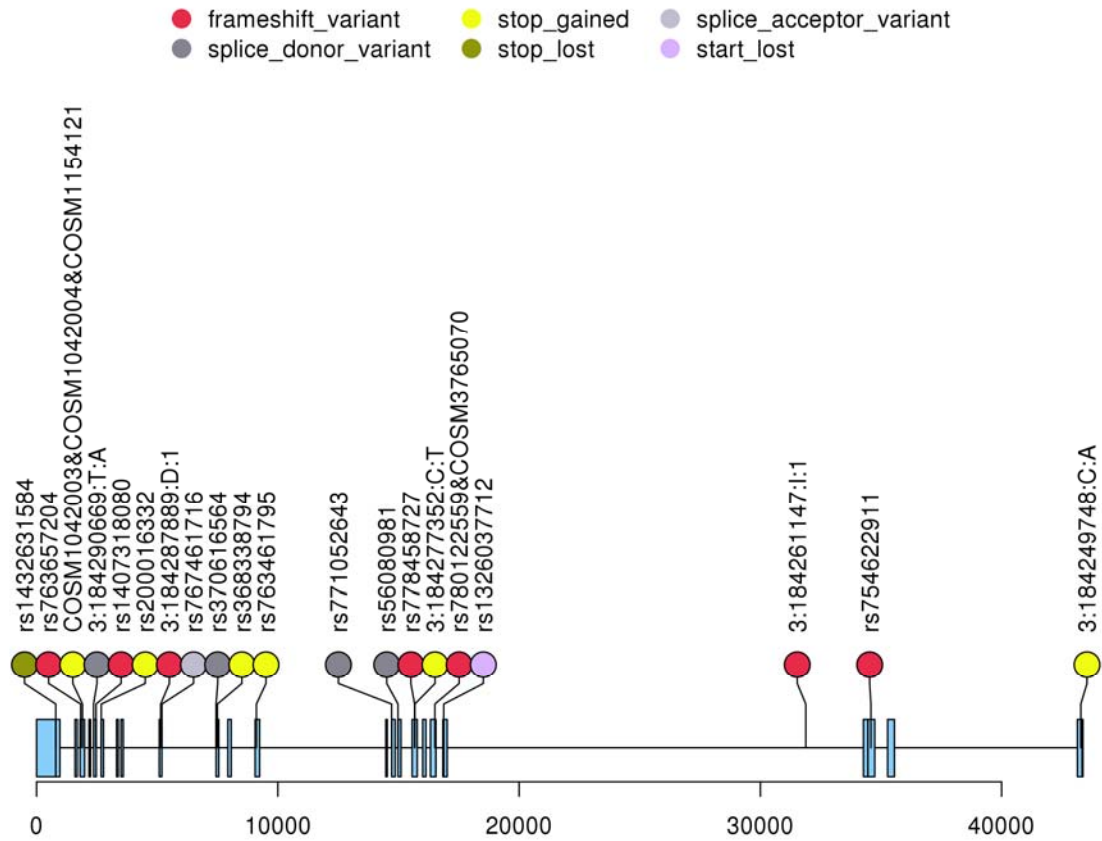

706  
707

708 **Figure 5.** Lollipop plot of genes with all loci binned in them. The color represents different types  
709 of variants as assonated by VEP. A. Lollipop plot for HOXB13 gene; B. Lollipop plot for MAPK12  
710 gene; C. Lollipop plot for ECE2 gene.

711



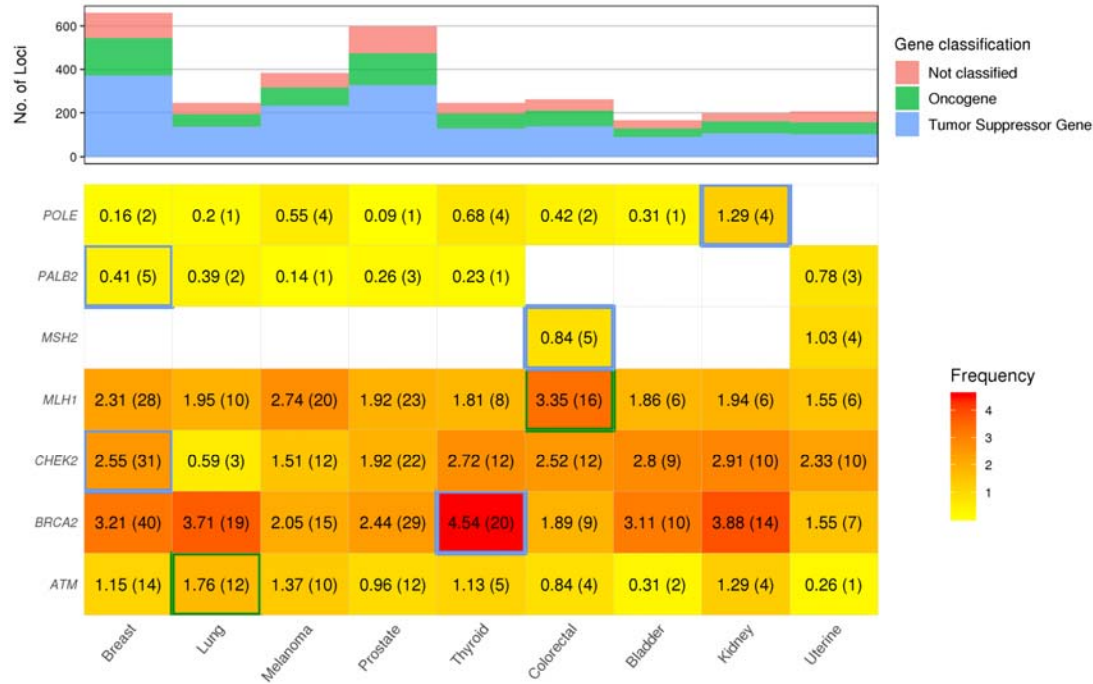

712

713 **Figure 6.** Carrier frequency of pathogenic and likely pathogenic variants across known  
 714 oncogenes and tumor suppressors.

715 The color of the boxes represents the carrier frequency of pathogenic and likely pathogenic  
 716 variants as denoted by the frequency legend.

717 The 7 genes significant at TFT p-value < 0.05 are marked with blue or green border.

718 The 2 genes replicated from Huang et al <sup>14</sup> are marked with green border.

719

720

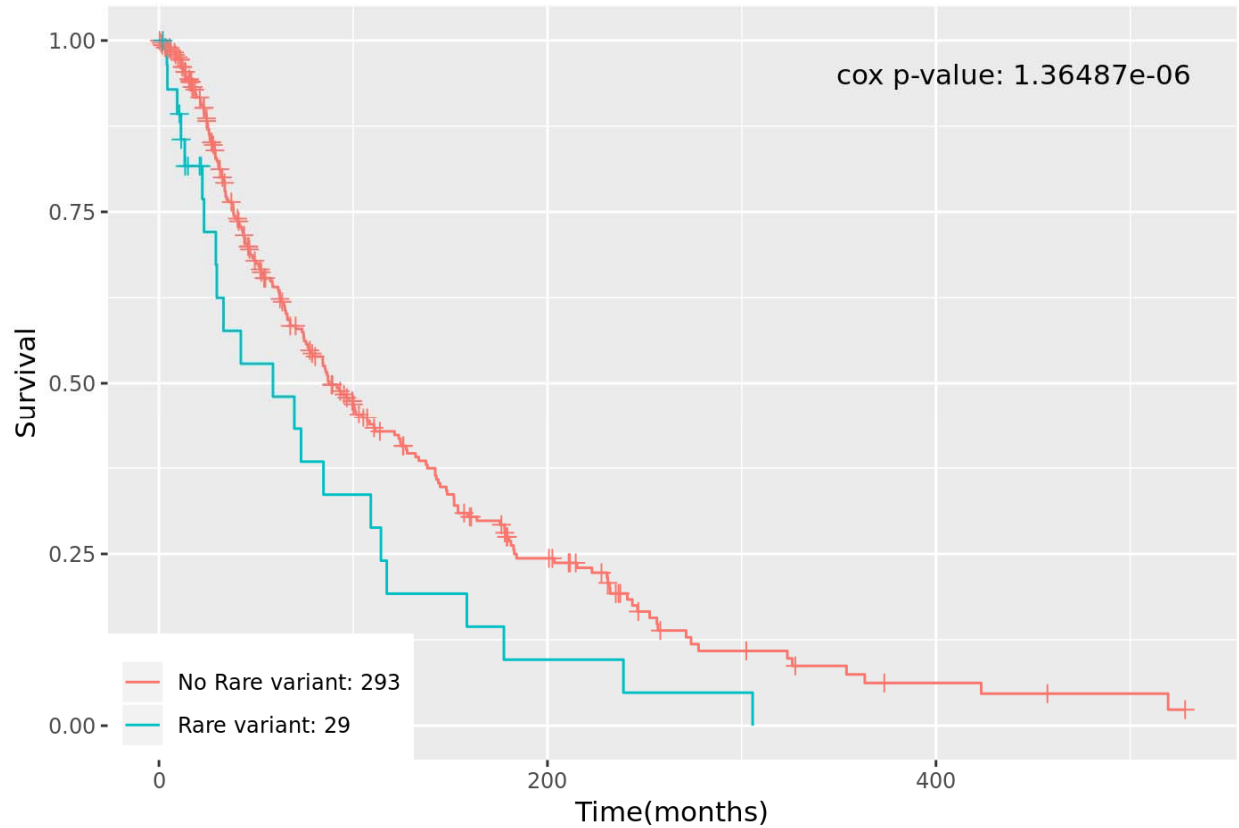

721  
722  
723  
724  
725  
726  
727  
728  
729  
730  
731  
732  
733  
734  
735  
736  
737  
738  
739  
740  
741  
742  
743

**Figure 7.** Kaplan Meier survival plot for gene *PCDHB8* which was significantly associated with survival in bladder cancer. *PCDHB8* was also significantly associated with survival in bladder cancer in TCGA dataset.

744 **Table 1.** Characteristics for the cancer patients.

| Cancer     | Phase | Case sample size | Diagnosis age <sup>#</sup> | Female ratio | BMI <sup>*</sup> | Alive | Deceased |
|------------|-------|------------------|----------------------------|--------------|------------------|-------|----------|
| Bladder    | 1     | 322              | 67.27 +/- 11.83            | 18.32%       | 29.72 +/- 6.01   | 215   | 107      |
|            | 2     | 93               | 65.72 +/- 12.65            | 25.81%       | 30.76 +/- 6.13   | 86    | 7        |
| Breast     | 1     | 1214             | 59.37 +/- 11.91            | 100%         | 31.08 +/- 7.2    | 1036  | 178      |
|            | 2     | 472              | 56.37 +/- 12.16            | 100%         | 30.86 +/- 6.94   | 454   | 18       |
| Colorectal | 1     | 477              | 64.37 +/- 12.29            | 46.54%       | 30.85 +/- 6.81   | 317   | 160      |
|            | 2     | 163              | 59.42 +/- 12.74            | 44.79%       | 31.36 +/- 7.22   | 144   | 19       |
| Kidney     | 1     | 309              | 62.19 +/- 11.53            | 37.22%       | 32.64 +/- 7.4    | 244   | 65       |
|            | 2     | 94               | 60.27 +/- 11.43            | 39.36%       | 32.73 +/- 6.53   | 86    | 8        |
| Lung       | 1     | 512              | 67.47 +/- 10.52            | 43.36%       | 28.82 +/- 6.61   | 175   | 336      |
|            | 2     | 146              | 63.51 +/- 10.19            | 53.42%       | 29.1 +/- 7.11    | 92    | 53       |
| Melanoma   | 1     | 730              | 61.32 +/- 14.8             | 42.05%       | 30.42 +/- 6.27   | 614   | 116      |
|            | 2     | 252              | 57.22 +/- 15.19            | 45.63%       | 30.31 +/- 6.6    | 243   | 9        |
| Prostate   | 1     | 1146             | 65.24 +/- 8.05             | 0%           | 30.01 +/- 5.25   | 935   | 211      |
|            | 2     | 369              | 63.86 +/- 8.74             | 0%           | 30.16 +/- 5.36   | 356   | 13       |
| Thyroid    | 1     | 441              | 48.64 +/- 14.65            | 79.82%       | 31.79 +/- 7.69   | 414   | 26       |
|            | 2     | 101              | 46.08 +/- 16.14            | 80.20%       | 31.62 +/- 7.88   | 101   | 0        |
| Uterine    | 1     | 387              | 60.26 +/- 11.69            | 100%         | 38.33 +/- 9.82   | 342   | 45       |
|            | 2     | 221              | 61.07 +/- 10.41            | 100%         | 36.76 +/- 10.44  | 209   | 12       |
| All        | 1     | 5538             | 61.85 +/- 12.71            | 51.97%       | 31.12 +/- 7.18   | 4292  | 1244     |
| Combined   | 2     | 1911             | 59.38 +/- 12.77            | 57.61%       | 31.37 +/- 7.45   | 1771  | 139      |

745 Table shows case distribution and characteristics from Phase 1 and Phase 2.

746 <sup>#</sup>Average Age of patients at diagnosis in years +/- standard deviation

747 <sup>\*</sup>Average BMI of the patients in kg/m<sup>2</sup> +/- standard deviation

748  
749  
750  
751  
752  
753  
754  
755  
756  
757  
758  
759  
760  
761  
762  
763

764 **Table 2.** Pathways significantly associated with cancers in both discovery and replication  
765 datasets.

| Cancer     | KEGG Pathway                                               | Discovery |          |             |                 |                      | Replication |           |              |       |
|------------|------------------------------------------------------------|-----------|----------|-------------|-----------------|----------------------|-------------|-----------|--------------|-------|
|            |                                                            | N locus   | MAC Case | MAC Control | SKAT-O <i>P</i> | Bonferro ni <i>P</i> | N locus     | MA C Case | MAC Contro l | SKAT- |
| Bladder    | Insulin secretion                                          | 325       | 56       | 822         | 2.72E-12        | 8.57E-10             | 160         | 19        | 435          | 2.07E |
| Bladder    | Bladder cancer                                             | 124       | 34       | 550         | 4.28E-07        | 1.35E-04             | 55          | 13        | 432          | 1.84E |
| Bladder    | GnRH signaling pathway                                     | 358       | 81       | 1728        | 1.99E-06        | 6.28E-04             | 187         | 32        | 761          | 1.47E |
| Bladder    | FoxO signaling pathway                                     | 341       | 63       | 1298        | 2.37E-06        | 7.46E-04             | 179         | 23        | 653          | 1.11E |
| Bladder    | Inflammatory mediator regulation of TRP channels           | 419       | 87       | 1770        | 3.47E-06        | 1.09E-03             | 212         | 31        | 696          | 2.22E |
| Bladder    | Pathways in cancer                                         | 1203      | 256      | 5138        | 1.11E-05        | 3.49E-03             | 565         | 100       | 2402         | 2.55E |
| Bladder    | Metabolic pathways                                         | 5806      | 1225     | 27356       | 2.23E-05        | 7.04E-03             | 2906        | 425       | 11816        | 3.59E |
| Bladder    | Regulation of lipolysis in adipocytes                      | 191       | 62       | 1215        | 3.45E-05        | 1.09E-02             | 94          | 23        | 427          | 3.08E |
| Bladder    | Glycosphingolipid biosynthesis - lacto and neolacto series | 95        | 28       | 601         | 3.88E-05        | 1.22E-02             | 45          | 8         | 196          | 8.40E |
| Bladder    | Apelin signaling pathway                                   | 492       | 92       | 1630        | 4.65E-05        | 1.47E-02             | 230         | 39        | 743          | 1.70E |
| Bladder    | Endocrine resistance                                       | 325       | 70       | 1435        | 7.95E-05        | 2.50E-02             | 148         | 37        | 984          | 2.92E |
| Bladder    | Thyroid hormone synthesis                                  | 352       | 60       | 1100        | 9.94E-05        | 3.13E-02             | 174         | 20        | 473          | 2.05E |
| Colorectal | Gap junction                                               | 269       | 64       | 875         | 1.36E-07        | 4.27E-05             | 128         | 27        | 402          | 8.70E |
| Colorectal | Retrograde endocannabinoid signaling                       | 296       | 72       | 960         | 1.06E-06        | 3.33E-04             | 150         | 36        | 603          | 7.34E |
| Colorectal | Amino sugar and nucleotide sugar metabolism                | 252       | 66       | 947         | 1.06E-05        | 3.35E-03             | 121         | 23        | 321          | 5.19E |
| Colorectal | Long-term depression                                       | 250       | 76       | 999         | 2.25E-05        | 7.10E-03             | 126         | 42        | 570          | 1.27E |
| Colorectal | Apoptosis                                                  | 474       | 132      | 1930        | 1.06E-04        | 3.33E-02             | 246         | 85        | 953          | 1.00E |
| Kidney     | Base excision repair                                       | 191       | 49       | 865         | 9.83E-10        | 3.10E-07             | 88          | 10        | 242          | 4.25E |
| Kidney     | Primary bile acid biosynthesis                             | 88        | 17       | 199         | 1.60E-05        | 5.03E-03             | 38          | 5         | 70           | 6.18E |
| Kidney     | HTLV-I infection                                           | 728       | 248      | 5636        | 2.19E-05        | 6.90E-03             | 342         | 101       | 2260         | 4.55E |
| Kidney     | Glycerolipid metabolism                                    | 282       | 74       | 1333        | 7.03E-05        | 2.22E-02             | 152         | 26        | 841          | 1.50E |
| Kidney     | Breast cancer                                              | 413       | 60       | 1116        | 8.80E-05        | 2.77E-02             | 184         | 55        | 1137         | 2.62E |
| Lung       | Collecting duct acid secretion                             | 98        | 23       | 166         | 2.29E-06        | 7.22E-04             | 47          | 6         | 104          | 1.11E |
| Lung       | Complement and coagulation cascades                        | 383       | 164      | 2092        | 1.05E-04        | 3.31E-02             | 188         | 22        | 748          | 2.26E |
| Thyroid    | Nicotinate and nicotinamide metabolism                     | 158       | 64       | 942         | 5.73E-05        | 1.80E-02             | 75          | 15        | 389          | 9.20E |
| Thyroid    | Other types of O-glycan biosynthesis                       | 75        | 10       | 134         | 1.22E-04        | 3.85E-02             | 45          | 5         | 57           | 3.10E |

766 N locus: Total number of genomic loci binned in pathway.

767 MAC Case: Total minor allele count of variants in pathway in case population.

768 MAC Control: Total minor allele count of variants in pathway in control population.

769

770

771

772

773

774 **Table 3.** Pathways significantly associated with more than one cancer.

| KEGG Pathway                                | N Cancers | Cancers                              |
|---------------------------------------------|-----------|--------------------------------------|
| Apoptosis                                   | 3         | Colorectal, Kidney, Lung             |
| Axon guidance                               | 2         | Colorectal, Lung                     |
| Basal cell carcinoma                        | 2         | Bladder, Kidney                      |
| Bladder cancer                              | 3         | Bladder, Kidney, Uterine             |
| Choline metabolism in cancer                | 2         | Kidney, Lung                         |
| FoxO signaling pathway                      | 4         | Bladder, Colorectal, Kidney, Lung    |
| Gap junction                                | 2         | Colorectal, Uterine                  |
| Glycerolipid metabolism                     | 2         | Kidney, Melanoma                     |
| GnRH signaling pathway                      | 4         | Bladder, Colorectal, Kidney, Uterine |
| Homologous recombination                    | 2         | Breast, Lung                         |
| HTLV-I infection                            | 2         | Bladder, Kidney                      |
| Legionellosis                               | 2         | Bladder, Kidney                      |
| Melanoma                                    | 2         | Kidney, Uterine                      |
| Metabolic pathways                          | 2         | Bladder, Kidney                      |
| Neurotrophin signaling pathway              | 2         | Colorectal, Melanoma                 |
| Pancreatic secretion                        | 2         | Thyroid, Uterine                     |
| Platinum drug resistance                    | 2         | Kidney, Lung                         |
| Protein processing in endoplasmic reticulum | 2         | Kidney, Uterine                      |
| Rap1 signaling pathway                      | 2         | Lung, Uterine                        |
| Regulation of actin cytoskeleton            | 2         | Colorectal, Lung                     |
| VEGF signaling pathway                      | 2         | Colorectal, Lung                     |

775 All pathways were significant in the cancers provided in column 3 with Bonferroni-corrected  $P < 0.05$

776  
777  
778  
779  
780  
781  
782  
783  
784  
785  
786  
787  
788  
789  
790  
791  
792

793 **Table 4.** Genes associated with cancers that were replicated.

| Cancer   | Gene information |                        | Discovery |          |             |                |                              | Replication |          |             |                |
|----------|------------------|------------------------|-----------|----------|-------------|----------------|------------------------------|-------------|----------|-------------|----------------|
|          | Gene             | Chr: Build 38 position | N locus   | MAC Case | MAC Control | SKAT-O p-value | Bonferroni corrected p-value | N locus     | MAC Case | MAC Control | SKAT-O p-value |
| Kidney   | <i>MLNR</i>      | 13: 49220338-49222377  | 5         | 6        | 39          | 1.07E-07       | 3.70E-04                     | 3           | 7        | 48          | 7.89E-04       |
| Kidney   | <i>CPAMD8</i>    | 19: 16892947-17026818  | 23        | 9        | 75          | 2.24E-07       | 7.70E-04                     | 14          | 3        | 43          | 1.29E-04       |
| Uterine  | <i>CHRNE</i>     | 17: 4801064-4806369    | 17        | 9        | 95          | 7.92E-07       | 2.70E-03                     | 17          | 8        | 27          | 1.29E-04       |
| Prostate | <i>HOXB13</i>    | 17: 48724763-48728749  | 5         | 19       | 37          | 2.86E-06       | 1.06E-02                     | 2           | 8        | 14          | 5.54E-04       |
| Bladder  | <i>SCML4</i>     | 6: 107697297-107845959 | 6         | 5        | 116         | 2.26E-07       | 7.70E-04                     | 4           | 3        | 18          | 1.13E-04       |
| Thyroid  | <i>BST1</i>      | 4: 15701866-15774178   | 21        | 5        | 41          | 2.36E-07       | 8.20E-04                     | 13          | 4        | 49          | 2.56E-04       |
| Uterine  | <i>TMEM186</i>   | 16: 8795180-8797648    | 3         | 13       | 101         | 8.66E-08       | 3.00E-04                     | 2           | 10       | 47          | 4.49E-04       |

794 N locus: Total number of genomic loci binned in gene.

795 MAC Case: Total minor allele count of variants in gene in case population.

796 MAC Control: Total minor allele count of variants in gene in control population.

797  
798  
799  
800  
801  
802  
803  
804  
805  
806  
807  
808  
809  
810  
811  
812  
813

814 **Table 5. Genes significantly associated with more than one cancer.**

| Cancer     | Gene information |                        | Discovery |          |             |                |                              |
|------------|------------------|------------------------|-----------|----------|-------------|----------------|------------------------------|
| Cancer     | Gene             | Chr: Build 38 position | N locus   | MAC Case | MAC Control | SKAT-O p-value | Bonferroni corrected p-value |
| Bladder    | <i>MAPK12</i>    | 22: 50252901-50261810  | 7         | 6        | 42          | 1.18E-06       | 4.02E-03                     |
| Colorectal | <i>MAPK12</i>    | 22: 50252901-50261810  | 9         | 8        | 42          | 1.18E-05       | 4.08E-02                     |
| Colorectal | <i>ECE2</i>      | 3: 184276011-184293031 | 17        | 4        | 17          | 7.23E-06       | 2.50E-02                     |
| Melanoma   | <i>ECE2</i>      | 3: 184276011-184293031 | 20        | 6        | 17          | 2.93E-06       | 1.04E-02                     |
| Lung       | <i>DNMT3A</i>    | 2: 25232961-25342590   | 30        | 10       | 28          | 6.62E-10       | 2.00E-06                     |
| Bladder    | <i>DNMT3A</i>    | 2: 25232961-25342590   | 25        | 6        | 27          | 2.21E-06       | 7.53E-03                     |
| Colorectal | <i>CHIA</i>      | 1: 111290852-111320566 | 9         | 9        | 70          | 4.14E-10       | 1.00E-06                     |
| Melanoma   | <i>CHIA</i>      | 1: 111290852-111320566 | 9         | 8        | 70          | 1.38E-05       | 4.89E-02                     |

815  
816  
817  
818  
819  
820  
821  
822  
823  
824  
825  
826  
827  
828  
829  
830  
831  
832  
833  
834  
835  
836  
837  
838  
839  
840  
841  
842  
843

844 **Table 6.** Genes associated with survival

| Cancer   | Gene                       | N cases <sup>#</sup> | N controls <sup>*</sup> | Cox p-value | FDR      | Bonferroni | Permutator p-value |
|----------|----------------------------|----------------------|-------------------------|-------------|----------|------------|--------------------|
| Thyroid  | <i>NAA38</i>               | 10                   | 430                     | 1.67E-05    | 9.80E-03 | 9.80E-03   | 2.98E-03           |
| Melanoma | <i>THNSL1</i>              | 18                   | 712                     | 1.75E-06    | 1.60E-03 | 1.60E-03   | 8.40E-04           |
| Uterine  | <i>SAXO2</i>               | 17                   | 370                     | 7.56E-05    | 1.95E-02 | 3.89E-02   | 6.20E-04           |
|          | <i>DCHS2</i> <sup>^</sup>  | 19                   | 368                     | 9.71E-07    | 5.00E-04 | 5.00E-04   | 1.50E-04           |
|          | <i>DBF4B</i>               | 13                   | 374                     | 1.77E-04    | 3.04E-02 | 9.15E-02   | 5.84E-03           |
| Bladder  | <i>PCDHB8</i> <sup>^</sup> | 29                   | 293                     | 1.36E-06    | 6.00E-04 | 6.00E-04   | 4.50E-04           |
| Breast   | <i>ANO5</i>                | 15                   | 1199                    | 1.75E-04    | 4.92E-02 | 2.46E-01   | 1.56E-03           |
|          | <i>HOGA1</i>               | 10                   | 1204                    | 4.23E-05    | 1.98E-02 | 5.94E-02   | 2.39E-03           |
|          | <i>CSH2</i>                | 22                   | 1192                    | 3.71E-07    | 9.80E-03 | 9.80E-03   | 2.98E-03           |
|          | <i>ATXN3</i>               | 10                   | 1204                    | 3.89E-05    | 1.60E-03 | 1.60E-03   | 8.40E-04           |
|          | <i>FAM186A</i>             | 35                   | 1179                    | 1.64E-04    | 1.95E-02 | 3.89E-02   | 6.20E-04           |
| Prostate | <i>TPTE2</i>               | 15                   | 1131                    | 3.25E-05    | 5.00E-04 | 5.00E-04   | 1.50E-04           |
| Kidney   | <i>HLA-G</i>               | 10                   | 299                     | 5.54E-06    | 3.04E-02 | 9.15E-02   | 5.84E-03           |

845 <sup>#</sup> Number of cancer patients who have rare variants in given gene

846 <sup>\*</sup> Number of cancer patients who do not have rare variants in given gene

847 <sup>^</sup> Genes significantly associated with survival in TCGA data- *PCDHB8* (Logrank P = 9.22E-03) and *DCHS2* (Logrank P =  
848 0.036)

849

850

851

852

853

854

855

856

857

858

859

860

861

862

863

864

865



866 **Table 7.** Pathways associated with survival

| Cancer   | KEGG Pathway                                       | N cases <sup>#</sup> | N controls <sup>*</sup> | Cox p-value | FDR      | Bonferroni | Permutation p-value |
|----------|----------------------------------------------------|----------------------|-------------------------|-------------|----------|------------|---------------------|
| Melanoma | Phenylalanine tyrosine and tryptophan biosynthesis | 19                   | 711                     | 6.77E-05    | 2.05E-02 | 2.05E-02   | 5.20E-04            |
| Melanoma | Phenylalanine metabolism                           | 31                   | 699                     | 1.57E-04    | 2.39E-02 | 4.77E-02   | 3.90E-04            |

867 <sup>#</sup> Number of cancer patients who have rare variants in given gene

868 <sup>\*</sup> Number of cancer patients who do not have rare variants in given gene

869
